# Supplementary material
Source: publisher figshare collection journal article supplement (https://karger.figshare.com/articles/dataset/_/7484741)
Supplement: Supplementary file 1 [file 1]

**Supplement table 1**

Characteristics of natural occurring TH<sup>+</sup> cells and of *in vitro* generated induced TH<sup>+</sup> cells.

**Natural occurring TH<sup>+</sup> neuronal cells *in vivo***

| <i>Feature</i>            | <i>Phenotype or impact</i>                                                                                                                                                                                                                                     | <i>Reference</i> |
|---------------------------|----------------------------------------------------------------------------------------------------------------------------------------------------------------------------------------------------------------------------------------------------------------|------------------|
| Regulation of TH          | phosphorylation status of subunits, environmental pH value, tetrahydrobiopterin (BH <sub>4</sub> ), bivalent iron (Fe <sup>2+</sup> ), product feedback inhibition, proteasomal degradation, hypoxia                                                           | 1-7              |
| Marker expression         | human TH <sup>+</sup> : TH, vesicular monoamine transporter 2 (VMAT-2), CD163, CD19, prollyl-4-hydroxylase, dopamine-β-hydroxylase (DBH), 3,4-dihydroxyphenylalanine (DOPA) decarboxylase<br>murine TH <sup>+</sup> : TH, VMAT-2, intracellular catecholamines | 8<br>9           |
| Appearance <i>in vivo</i> | human TH <sup>+</sup> : in patients with chronic rheumatoid arthritis, osteoarthritis and multiple sclerosis<br>murine TH <sup>+</sup> : highest at the beginning of chronic collagen-induced arthritis (CIA)                                                  | 8, 10-12<br>9    |
| Organ specificity         | human TH <sup>+</sup> : synovial tissue and >>blood<br>murine TH <sup>+</sup> : joint, lymph nodes, thymus, bone marrow, spleen,                                                                                                                               | 8, 10, 11<br>9   |
| Effect <i>in vitro</i>    | human TH <sup>+</sup> : anti-inflammatory (inhibition of TNF); release of norepinephrine                                                                                                                                                                       | 8, 11            |
| Sensitivity               | murine TH <sup>+</sup> : targeted killing by 6-hydroxydopamine (6-OHDA)                                                                                                                                                                                        | 9                |

***in vitro* generated induced TH<sup>+</sup> neuronal cells (iTH<sup>+</sup>)**

|                         |                                                                                                                                                                                                                                                         |              |
|-------------------------|---------------------------------------------------------------------------------------------------------------------------------------------------------------------------------------------------------------------------------------------------------|--------------|
| Differentiation factors | human iTH <sup>+</sup> : sonic hedgehog (SHH), human fibroblast growth factor 8 (FGF8), basic fibroblast growth factor (bFGF), brain-derived neurotrophic factor (BDNF)<br>murine iTH <sup>+</sup> : B27 supplement, SHH, FGF8, murine bFGF, human BDNF | 13<br>14, 15 |
| Morphology              | human iTH <sup>+</sup> : neural tube-like structures; cell-connected rosette-like patterns<br>murine iTH <sup>+</sup> : neuron-like; cell-connected rosette-like patterns                                                                               | 16<br>14     |
| Marker expression       | human iTH <sup>+</sup> : TH, β-III-tubuline, VMAT-2, nuclear receptor related 1 (Nurr1)<br>murine iTH <sup>+</sup> : TH, β-III-tubuline, VMAT-2, Nurr1                                                                                                  | 13<br>14     |
| Secretion               | human iTH <sup>+</sup> : dopamine<br>murine iTH <sup>+</sup> : norepinephrine, dopamine                                                                                                                                                                 | 13<br>14     |
| Effect <i>in vivo</i>   | murine iTH <sup>+</sup> : CIA: anti-inflammatory (decreased clinical arthritis score, less cell infiltration into synovial tissue)                                                                                                                      | 14           |
| Sensitivity             | human iTH <sup>+</sup> : reduced release of norepinephrine by TNF treatment<br>murine iTH <sup>+</sup> : targeted killing by 6-OHDA                                                                                                                     | 17<br>14     |

## References Supplement table 1

- 1 Dunkley PR et al. Tyrosine hydroxylase phosphorylation: regulation and consequences. *J Neurochem* 2004;91:1025–43.
- 2 Haycock JW. Phosphorylation of tyrosine hydroxylase in situ at serine 8, 19, 31, and 40. *J Biol Chem* 1990;265:11682–91.
- 3 Haavik J et al. pH-dependent release of catecholamines from tyrosine hydroxylase and the effect of phosphorylation of Ser-40. *FEBS Lett* 1990;262:363–65.
- 4 Schmidt TS & Alp NJ. Mechanisms for the role of tetrahydrobiopterin in endothelial function and vascular disease. *Clin Sci (Lond)* 2007;113:47–63.
- 5 Nakashima A. Proteasomal degradation of tyrosine hydroxylase and neurodegeneration. *J Neurochem* 2012;120:199–201.
- 6 Kumar GK et al. Activation of tyrosine hydroxylase by intermittent hypoxia: involvement of serine phosphorylation. *J Appl Physiol* 2003;95:536–44.
- 7 Kumar GK. Hypoxia. 3. Hypoxia and neurotransmitter synthesis. *Am J Physiol Cell Physiol* 2011;300:C743–51.
- 8 Capellino S et al. Catecholamine-producing cells in the synovial tissue during arthritis: modulation of sympathetic neurotransmitters as new therapeutic target. *Ann Rheum Dis* 2010;69(10):1853-60.
- 9 Capellino S et al. First appearance and location of catecholaminergic cells during experimental arthritis and elimination by chemical sympathectomy. *Arthritis Rheum* 2012;64(4):1110-8.
- 10 Miller LE et al. The loss of sympathetic nerve fibers in the synovial tissue of patients with rheumatoid arthritis is accompanied by increased norepinephrine release from synovial macrophages. *FASEB J* 2000;14(13):2097-107.
- 11 Miller LE et al. Norepinephrine from synovial tyrosine hydroxylase positive cells is a strong indicator of synovial inflammation in rheumatoid arthritis. *J Rheumatol* 2002;29(3):427-35.
- 12 Cosentino M et al. Catecholamine production and tyrosine hydroxylase expression in peripheral blood mononuclear cells from multiple sclerosis patients: effect of cell stimulation and possible relevance for activation-induced apoptosis. *J Neuroimmunol* 2002;133: 233–40.
- 13 Trzaska KA & Rameshwar P. Dopaminergic neuronal differentiation protocol for human mesenchymal stem cells. *Methods Mol Biol* 2011;698:295–303.
- 14 Jenei-Lanzl Z et al. Anti-inflammatory effects of cell-based therapy with tyrosine hydroxylase-positive catecholaminergic cells in experimental arthritis. *Ann Rheum Dis* 2015;74(2):444-51.
- 15 Zhu H et al. A protocol for isolation and culture of mesenchymal stem cells from mouse compact bone. *Nat Protoc* 2010;5:550–60.
- 16 Zhang SC et al. In vitro differentiation of transplantable neural precursors from human embryonic stem cells. *Nat Biotechnol* 2001;19:1129–33.
- 17 Herrmann M et al. TNF inhibits catecholamine production from induced sympathetic neuron-like cells in rheumatoid arthritis and osteoarthritis in vitro. *Sci Rep* 2018;8:9645.

Supplement table 2

Summary of direct pro-/ anti-inflammatory and direct pro-/ anti-nociceptive effects mediated by selected cytokines and chemokines in antigen-induced arthritis and other experimental arthritis models

| <i>Cytokine/<br/>Chemokine</i> | <i>Model,<br/>Species</i>                                            | <i>Effect on<br/>inflammation</i>                           | <i>nociception</i>                                             | <i>Reference</i> |
|--------------------------------|----------------------------------------------------------------------|-------------------------------------------------------------|----------------------------------------------------------------|------------------|
| IL-4                           | <b>AIA, m</b><br>CIA, m<br>K/BxN, m<br>AA, m<br>AA, r                | <b>anti-inflammatory</b>                                    | n.d.                                                           | 1                |
|                                |                                                                      | anti-inflammatory                                           | n.d.                                                           | 2                |
|                                |                                                                      | pro-inflammatory (requirement for induction)                | n.d.                                                           | 3                |
|                                |                                                                      | pro-inflammatory (requirement for induction)                | n.d.                                                           | 4                |
|                                |                                                                      | anti-inflammatory                                           | n.d.                                                           | 5                |
| IL-6                           | <b>AIA, m/r</b><br>CIA, m<br>K/BxN, m                                | <b>pro-inflammatory</b>                                     | <b>pro-nociceptive (mechanical hyperalgesia)</b>               | 6-9              |
|                                |                                                                      | pro-inflammatory                                            | n.d.                                                           | 10               |
|                                |                                                                      | no influence                                                | n.d.                                                           | 11               |
| IL-17A                         | <b>AIA, m/r</b><br>CIA, m<br>K/BxN, m                                | <b>no influence</b>                                         | <b>pro-nociceptive (mechanical hyperalgesia)</b>               | 12-14            |
|                                |                                                                      | pro-inflammatory                                            | n.d.                                                           | 15, 16           |
|                                |                                                                      | pro-inflammatory                                            | n.d.                                                           | 17               |
| TNF $\alpha$                   | <b>AIA, m/r</b><br>CIA, m<br>K/BxN, m<br>TNFtg, m<br>CFA, r<br>AA, r | <b>pro-inflammatory</b>                                     | <b>pro-nociceptive (thermal &amp; mechanical hyperalgesia)</b> | 18, 19           |
|                                |                                                                      | pro-inflammatory                                            | pro-nociceptive (thermal & mechanical hyperalgesia)            | 20, 21           |
|                                |                                                                      | pro-inflammatory                                            | pro-nociceptive (mechanical hyperalgesia)                      | 11, 22           |
|                                |                                                                      | pro-inflammatory                                            | pro-nociceptive (thermal & mechanical hyperalgesia)            | 23, 24           |
|                                |                                                                      | pro-inflammatory                                            | pro-nociceptive (thermal & mechanical hyperalgesia)            | 25               |
|                                |                                                                      | anti-inflammatory (by exogenous TNF $\alpha$ only)          | n.d.                                                           | 26               |
| CXCL1<br>(GRO- $\alpha$ )      | <b>AIA, m</b><br>CIA, m<br>K/BxN, m<br>CAIA, m<br>AA, r              | <b>pro-inflammatory</b>                                     | <b>pro-nociceptive (mechanical hyperalgesia)</b>               | 14, 27-29        |
|                                |                                                                      | pro-inflammatory                                            | pro-nociceptive (mechanical hyperalgesia)                      | 30               |
|                                |                                                                      | pro-inflammatory                                            | n.d.                                                           | 31, 32           |
|                                |                                                                      | pro-inflammatory                                            | n.d.                                                           | 33               |
| CXCL2<br>(GRO- $\beta$ )       | <b>AIA, m</b><br>CIA, m                                              | <b>pro-inflammatory</b>                                     | <b>pro-nociceptive (mechanical hyperalgesia)</b>               | 29               |
|                                |                                                                      | pro-inflammatory (on bone erosion only) & anti-inflammatory | n.d.                                                           | 35, 36           |
| CCL5<br>(RANTES)               | CIA, m<br>AA, r                                                      | pro-inflammatory                                            | n.d.                                                           | 37               |
|                                |                                                                      | pro-inflammatory                                            | n.d.                                                           | 38, 39           |

*IL* interleukin, *TNF* tumor necrosis factor, *CCL* Chemokine (C-C motif) ligand, *RANTES* regulated on activation normal T cell expressed and secreted, *CXCL* chemokine (C-X-C motif) ligand, *GRO* growth-regulated oncogene, **AIA** antigen-induced arthritis, *CIA* collagen-induced arthritis, *K/BxN* K/BxN serum transfer arthritis, *AA* adjuvant arthritis, *TNFtg* TNF $\alpha$  transgenic mice spontaneous arthritis, *CFA* complete Freund's adjuvant-induced arthritis, *CAIA* anti-collagen antibody-induced arthritis, *m* murine, *r* rat, *n.d.* no data

## References Supplement table 2

- 1 Yoshino S et al. Enhancement of T-cell-mediated arthritis in mice by treatment with a monoclonal antibody against interleukin-4. *Cell Immunol* 1998;185:153-7.
- 2 Marcelletti JF et al. Collagen-induced arthritis in mice. Relationship of collagen-specific and total IgE synthesis to disease. *J Immunol* 1991;147:4185-91.
- 3 Ohmura K et al. Interleukin-4 can be a key positive regulator of inflammatory arthritis. *Arthritis Rheum.* 2005;52:1866-75.
- 4 Yoshino S et al. Successful induction of adjuvant arthritis in mice by treatment with a monoclonal antibody against IL-4. *J Immunol* 1998;161:6904-8.
- 5 Boyle DL et al. Intra-articular IL-4 gene therapy in arthritis: anti-inflammatory effect and enhanced th2 activity. *Gene Ther* 1999;6(12):1911-8.
- 6 Ebbinghaus M et al. Interleukin-6-dependent influence of nociceptive sensory neurons on antigen-induced arthritis. *Arthritis Res Ther.* 2015;17:334.
- 7 Boettger MK et al. Differential effects of locally and systemically administered soluble glycoprotein 130 on pain and inflammation in experimental arthritis. *Arthritis Res Ther.* 2010;12:R140.
- 8 Vazquez E et al. Spinal IL-6 is an amplifier of arthritic pain in the rat. *Arthritis Rheum* 2012;64:2233-42.
- 9 Nowell MA et al. Soluble IL-6 receptor governs IL-6 activity in experimental arthritis: blockade of arthritis severity by soluble glycoprotein130. *J Immunol* 2003;171:3202-9.
- 10 Alonzi T et al. Interleukin 6 is required for the development of collagen-induced arthritis. *J Exp Med* 1998;187:461-8.
- 11 Ji H et al. Critical roles for interleukin 1 and tumor necrosis factor alpha in antibody-induced arthritis. *J Exp Med.* 2002;196:77-85.
- 12 Ebbinghaus M et al. Interleukin-17A is involved in mechanical hyperalgesia but not in the severity of murine antigen-induced arthritis. *Sci Rep.* 2017;7:10334.
- 13 Richter F et al. Interleukin-17 sensitizes joint nociceptors to mechanical stimuli and contributes to arthritic pain through neuronal interleukin-17 receptors in rodents. *Arthritis Rheum.* 2012;64:4125-34.
- 14 Pinto LG et al. IL-17 mediates articular hypernociception in antigen-induced arthritis in mice. *Pain* 2010;148:247-56.
- 15 Chabaud M et al. IL-17 derived from juxta-articular bone and synovium contributes to joint degradation in rheumatoid arthritis. *Arthritis Res* 2001;3:168-77.
- 16 Nakae S et al. IL-17 production from activated T cells is required for the spontaneous development of destructive arthritis in mice deficient in IL-1 receptor antagonist. *Proc Natl Acad Sci USA* 2003;100:5986-90.
- 17 Katayama M et al. Neutrophils are essential as a source of IL-17 in the effector phase of arthritis. *PLoS ONE* 2013;8(5)
- 18 Boettger MK et al. Antinociceptive effects of TNF- $\alpha$  neutralization in a rat model of antigen-induced arthritis: evidence of a neuronal target. *Arthritis Rheum* 2008;58:2368-78.
- 19 Sachs D et al. Cooperative role of tumour necrosis factor- $\alpha$ , interleukin-1 $\beta$  and neutrophils in a novel behavioural model that concomitantly demonstrates articular inflammation and hypernociception in mice. *Br J Pharmacol* 2011;162:72-83.
- 20 McCann FE et al. Selective tumor necrosis factor receptor I blockade is antiinflammatory and reveals immunoregulatory role of tumor necrosis factor receptor II in collagen-induced arthritis. *Arthritis Rheum* 2014;66:2728-38.
- 21 Inglis JJ et al. Collagen-induced arthritis as a model of hyperalgesia: functional and cellular analysis of the analgesic actions of tumor necrosis factor blockade. *Arthritis Rheum.* 2007;56:4015-23.

- 22 Christianson CA et al. Characterization of the acute and persistent pain state present in K/BxN serum transfer arthritis. *Pain* 2010;151:394-403.
- 23 Keffer J et al. Transgenic mice expressing human tumour necrosis factor: a predictive genetic model of arthritis. *EMBO J* 1991;10:4025-31.
- 24 Hess A et al. Blockade of TNF-alpha rapidly inhibits pain responses in the central nervous system. *Proc Natl Acad Sci USA* 2011;108:3731-36.
- 25 Inglis JJ et al. The differential contribution of tumour necrosis factor to thermal and mechanical hyperalgesia during chronic inflammation. *Arthritis Res Ther* 2005;7:R807-16.
- 26 Kim EY et al. Exogenous tumour necrosis factor alpha induces suppression of autoimmune arthritis. *Arthritis Res Ther* 2008;10:R38.
- 27 Kehoe O et al. Syndecan-3 is selectively pro-inflammatory in the joint and contributes to antigen-induced arthritis in mice. *Arthritis Res Ther* 2014;16:R148.
- 28 Grespan R et al. CXCR2-specific chemokines mediate leukotriene B4-dependent recruitment of neutrophils to inflamed joints in mice with antigen-induced arthritis. *Arthritis Rheum* 2008;58:2030-40.
- 29 Coelho FM et al. The chemokine receptors CXCR1/CXCR2 modulate antigen-induced arthritis by regulating adhesion of neutrophils to the synovial microvasculature. *Arthritis Rheum* 2008;58:2329-37.
- 30 Cunha TM et al. Treatment with DF 2162, a non-competitive allosteric inhibitor of CXCR1/2, diminishes neutrophil influx and inflammatory hypernociception in mice. *Br J Pharmacol* 2008;154:460-70.
- 31 Jacobs JP et al. Deficiency of CXCR2, but not other chemokine receptors, attenuates autoantibody-mediated arthritis in a murine model. *Arthritis Rheum* 2010;62:1921-32.
- 32 Santos LL et al. Macrophage migration inhibitory factor regulates neutrophil chemotactic responses in inflammatory arthritis in mice. *Arthritis Rheum* 2011;63:960-70.
- 33 Min SH et al. Pharmacological targeting reveals distinct roles for CXCR2/CXCR1 and CCR2 in a mouse model of arthritis. *Biochem Biophys Res Commun* 2010;391:1080-6.
- 34 Barsante MM et al. Blockade of the chemokine receptor CXCR2 ameliorates adjuvant-induced arthritis in rats. *Br J Pharmacol* 2008;153:992-1002.
- 35 Ha J et al. CXC chemokine ligand 2 induced by receptor activator of NF-kappa B ligand enhances osteoclastogenesis. *J Immunol* 2010;184:4717-24.
- 36 Kasama T et al. Interleukin-10 expression and chemokine regulation during the evolution of murine type II collagen-induced arthritis. *J Clin Invest* 1995;95:2868-76.
- 37 Plater-Zyberk C et al. Effect of a CC chemokine receptor antagonist on collagen induced arthritis in DBA/1 mice. *Immunol Lett* 1997;57:117-20.
- 38 Barnes DA et al. Polyclonal antibody directed against human RANTES ameliorates disease in the Lewis rat adjuvant-induced arthritis model. *J Clin Invest* 1998;101:2910-9.
- 39 Shahrara S et al. Amelioration of rat adjuvant-induced arthritis by Met-RANTES. *Arthritis Rheum* 2005;52:1907-19.
